# Supplementary material
Source: publisher figshare collection journal article supplement (https://karger.figshare.com/ndownloader/files/26791562)
Supplement: Supplementary file 1 [file 26791562]

## Sheet: Leukemia
	Sample	Group	Amino Acid		3	13	17	19	25		26	28		32	33	38	41	43	46	48	51	56	57	60	61	62	63	65		66	67		68	82	84		85	91	93	95	99	104	106	108		109	110	114	115
			Nucleotide		169467	169437	169425	169418	169402	169400	169399	169393	169392	169379	169378	169361	169352	169348	169338	169333	169322	169308	169306	169295	169292	169289	169286	169282	169280	169278	169276	169274	169273	169230	169225	169224	169222	169125	169118	169112	169102	169085	169080	169074	169073	169072	169069	169055	169053
			B95-8		H	R	R	P	L		G	A		L	L	F	Y	V	D	T	A	Y	S	L	M	L	I	I		I	L		I	A	C		I	T	L	I	N	H	F	E		I	V		G
					a	g	g	c	c	a	g	g	c	c	c	t	c	g	g	a	c	a	t	c	t	t	a	a	a	a	t	g	a	c	t	g	a	c	g	t	a	a	t	g	a	a	g	c	g
	Leukemia	China1(28)	China1		R	P	L		I										N															G	G		L						Y
					g	c	t		a					g		c	t		a		g						t		c		c	c		g	g		c		a				a					t
			A9(1)		R	P	L		I										N															G	G		L						Y
					g	c	t		a					g		c	t		a		g						t		c		c	c		g	g		c		a				a					t
			A15(1)		R	P	L		I										N	A														G	G		L						Y
					g	c	t		a					g		c	t		a	g	g						t		c		c	c		g	g		c		a				a					t
			A18(1)		R	P	L		I																									G	G		L						Y
					g	c	t	t	a					g		c	t				g						t		c		c	c		g	g		c		a				a					t
			A23(1)		R	P	L		I										N															G	G		L						Y
					g	c	t		a					g		c	t		a		g						t		c		c	c		g	g		c		a				a					t
			A25(1)		R	P	L		I										N															G	G		L						Y
					g	c	t		a					g		c	t		a		g						t		c		c	c		g	g		c		a				a					t
			A26(1)		R	P	L		I										N															G	G		L						Y
					g	c	t		a					g		c	t		a		g						t		c		c	c		g	g		c		a				a					t
			A29(1)		R	P	L		I										N															G	G		L						Y
					g	c	t		a					g		c	t		a		g						t		c		c	c		g	g		c		a				a					t
			A44(1)		R	P	L		I																									G	G		L						Y			V
					g	c	t		a					g		c	t				g						t		c		c	c		g	g		c		a				a			g		t
			A48(1)		R	P	L		I																									G	G		L						Y
					g	c	t		a					g		c	t				g						t		c		c	c		g	g		c		a				a					t
			A50(1)		R	P	L		I										N															G	G		L						Y
					g	c	t		a					g		c	t		a		g						t		c		c	c		g	g		c		a				a					t
			A55(1)		R	P	L		I										N															G	G		L						Y				L
					g	c	t		a					g		c	t		a		g						t		c		c	c		g	g		c		a				a				c	t
			A57(1)		R	P	L		I										N															G	G		L						Y
					g	c	t		a					g		c	t		a		g						t		c		c	c		g	g		c		a				a					t
			A124(1)		R	P	L		I										N															G	G		L					L	Y	K
					g	c	t		a					g		c	t		a		g						t		c		c	c		g	g		c		a			t	a	a				t
			A126(1)		R	P	L		I			G	G						N															G	G		L						Y	G	G
					g	c	t		a				g	g		c	t		a		g						t		c		c	c		g	g		c		a				a		g			t
			A135(1)		R	P	L		I										N															G	G		L						Y
					g	c	t		a					g		c	t		a		g						t		c		c	c		g	g		c		a				a					t
			A182(1)		R	P	L		I										N															G	G		L						Y				L
					g	c	t		a					g		c	t		a		g						t		c		c	c		g	g		c		a				a				c	t
			A184(1)		R	P	L		I										N			C												G	G		L						Y
					g	c	t		a					g		c	t		a		g	g					t		c		c	c		g	g		c		a				a					t
			A188(1)		R	P	L		I										N									V						G	G		L						Y
					g	c	t		a					g		c	t		a		g						t	g			c	c		g	g		c		a				a					t
			A193(1)		R	P	L		I										N															G	G		L						Y
					g	c	t		a					g		c	t		a		g						t				c	c		g	g		c		a				a					t
			A199(1)		R	P	L		I										N															G	G		L						Y
					g	c	t		a					g		c	t		a		g						t				c	c		g	g		c		a				a					t
			A200(1)		R	P	L		I		R								N									V						G	G		L						Y
					g	c	t		a		c			g		c	t		a		g						t	g			c	c		g	g		c		a				a					t
			A237(1)		R	P	L		I										N									V						G	G		L						Y
					g	c	t		a		c			g		c	t		a		g						t	g			c	c		g	g		c		a				a					t
			A325(1)		R	P	L		I										N	A														G	G		L						Y
					g	c	t		a					g		c	t		a	g	g						t		c		c	c		g	g		c		a				a					t
			A337(1)		R	P	L		I										N															G	G		L						Y
					g	c	t		a					g		c	t		a		g						t		c		c	c		g	g		c		a				a					t
			A343(1)		R	P	L		I										N															G	G		L						Y
					g	c	t		a					g		c	t		a		g						t		c		c	c		g	g		c		a				a					t
			A346(1)		R	P	L		I										N															G	G		L						Y				L
					g	c	t		a					g		c	t		a		g						t		c		c	c		g	g		c		a				a				c	t
			A354(2)		R	P	L		I										N															G	G		L				D		Y
					g	c	t		a					g		c	t		a		g						t		c		c	c		g	g		c		a		g		a					t
		China2(2)	China 2		R	P	L		M						I			I	N				A											G	V		L	I		S			Y				L		A
					g	c	t		a	g				g	a	c		a	a		g		g				t		c		c	c		g	g	t	c	t		g			a				c		c
			A1(1)		R	P	L		M						I			I	N				A											G	V		L	I		S			Y				L		A
					g	c	t		a	g				g	a	c		a	a		g		g				t		c		c	c		g	g	t	c	t		g			a				c		c
			A347(1)		R	P	L		M						I			I	N				A											G	V		L	I		S			Y				L		A
					g	c	t		a	g				g	a	c		a	a		g		g				t		c		c	c		g	g	t	c	t		g			a				c		c
		Med-(3)	Med																																		L						Y
																																					c						a
			A7(1)																																		L						Y
																																					c						a
			A6(1)																																		L						Y
																																					c						a
			A35(1)																											L							L						Y			V
																														c							c						a			g
		B95-8(7)	A8(7)
	MDS	China1(9)	China1		R	P	L		I										N															G	G		L						Y
					g	c	t		a					g		c	t		a		g						t		c		c	c		g	g		c		a				a					t
			M1(1)		R	P	L		I										N						T									G	G		L						Y			V
					g	c	t		a					g		c	t		a		g				c		t		c		c	c		g	g		c		a				a			g		t
			M4(1)		R	P	L		I										N															G	G		L						Y
					g	c	t		a					g		c	t		a		g						t		c		c	c		g	g		c		a				a					t
			M5(1)		R	P	L		I										N														L	G	G		L						Y
					g	c	t		a					g		c	t		a		g						t		c		c	c	c	g	g		c		a				a					t
			M14(1)		R	P	L		I										N															G	G		L						Y
					g	c	t		a					g		c	t		a		g						t		c		c	c		g	g		c		a				a					t
			M18(1)		R	P	L		I										N														L	G	G		L						Y
					g	c	t		a					g		c	t		a		g						t		c		c	c	c	g	g		c		a				a					t
			M22(1)		R	P	L		I										N															G	G		L						Y
					g	c	t		a					g		c	t		a		g						t		c		c	c		g	g		c		a				a					t
			M50(1)		R	P	L		I			S							N															G	G		L						Y				L
					g	c	t		a			t		g		c	t		a		g						t				c	c		g	g		c		a				a				c	t
			M52(1)		R	P	L		I										N															G	G		L						Y
					g	c	t		a					g		c	t		a		g						t				c	c		g	g		c		a				a					t
			M53(1)		R	P	L		I										N											L				G	G		L						Y
					g	c	t		a					g		c	t		a		g						t			c	c	c		g	g		c		a				a					t
		B95-8(1)	M3(1)
			B95-8		H	R	R	P	L		G	A		L	L	F	Y	V	D	T	A	Y	S	L	M	L	I	I		I	L		I	A	C		I	T	L	I	N	H	F	E		I	V		G
					a	g	g	c	c	a	g	g	c	c	c	t	c	g	g	a	c	a	t	c	t	t	a	a	a	a	t	g	a	c	t	g	a	c	g	t	a	a	t	g	a	a	g	c	g
			Amino Acid		3	13	17	19	25		26	28		32	33	38	41	43	46	48	51	56	57	60	61	62	63	65		66	67		68	82	84		85	91	93	95	99	104	106	108		109	110	114	115
[truncated: 91 more columns]
